# Supplementary material for: Prevalence, age of decision, and interpersonal warmth judgements of childfree adults: Replication and extensions
Source: PubMed Central journal article supplement (PMC10075426; doi:10.1371/journal.pone.0283301), 2023-04-05
Supplement: pone.0283301.s001.pdf [file pone.0283301.s001.pdf]

**Supporting Information for:**  
**“Prevalence, age of decision, and interpersonal warmth judgements of childfree  
adults: Replication and extensions”**

Jennifer Watling Neal and Zachary P. Neal

## S1 Prevalence of reproductive statuses by subgroups

In the manuscript, Figure 2 illustrates the prevalence of each reproductive status within subgroups defined by sex, race, age, education, income, relationship status, and LGBTQIA identity. The text reports the prevalence of childfree adults within each category of each subgroup, and tests for differences. For the sake of completeness, Table S1 presents the estimated prevalence of each reproductive status within each category of subgroups defined by sex, race, age, education, income, relationship status, and LGBTQIA identity.

| Subgroup*                                                            | Childfree    | Parent       | NYP          | Undecided    | Childless   | Ambivalent  |
|----------------------------------------------------------------------|--------------|--------------|--------------|--------------|-------------|-------------|
| <u>Sex (<math>\chi^2 = 4.53</math> p = 0.03)</u>                     |              |              |              |              |             |             |
| Men                                                                  | 23.82 (2.4)  | 47.2 (2.9)   | 12.55 (2.36) | 8.04 (1.67)  | 4.98 (1.21) | 3.4 (0.97)  |
| Women                                                                | 18.2 (1.79)  | 58.11 (2.45) | 10.49 (1.65) | 6.86 (1.18)  | 3.6 (1.03)  | 2.75 (1.03) |
| <u>Race (<math>\chi^2 = 6.49</math> p = 0.01)</u>                    |              |              |              |              |             |             |
| White                                                                | 22.75 (1.7)  | 53.62 (2.08) | 9.48 (1.48)  | 7.49 (1.16)  | 4.03 (0.77) | 2.62 (0.75) |
| Non-White                                                            | 14.32 (2.91) | 49.76 (4.64) | 18.85 (3.82) | 7.23 (2.08)  | 5.14 (2.37) | 4.7 (1.82)  |
| <u>Age (<math>\chi^2 = 0.31</math> p = 0.58)</u>                     |              |              |              |              |             |             |
| Under 40                                                             | 19.65 (2.96) | 24.09 (3.15) | 35.69 (3.88) | 17.24 (2.73) | 1.86 (0.88) | 1.47 (0.93) |
| 40+                                                                  | 21.48 (1.71) | 64.75 (2.08) | 1.41 (0.54)  | 3.35 (0.84)  | 5.28 (1.05) | 3.74 (0.92) |
| <u>Education (<math>\chi^2 = 1.04</math> p = 0.31)</u>               |              |              |              |              |             |             |
| College grad                                                         | 23.13 (2.45) | 51.49 (3.03) | 10.39 (1.96) | 7.55 (1.46)  | 4.08 (1.2)  | 3.36 (1.09) |
| Not grad                                                             | 20.13 (1.82) | 53.27 (2.37) | 11.9 (1.82)  | 7.39 (1.28)  | 4.34 (0.99) | 2.96 (0.88) |
| <u>Income (<math>\chi^2 = 2.82</math> p = 0.09)</u>                  |              |              |              |              |             |             |
| Above median                                                         | 18.17 (2.1)  | 57.93 (2.86) | 11.12 (2.24) | 7.63 (1.53)  | 3.06 (0.87) | 2.1 (0.74)  |
| Below median                                                         | 22.77 (2.04) | 49.41 (2.54) | 11.74 (1.86) | 7.31 (1.35)  | 5.07 (1.18) | 3.71 (1.07) |
| <u>Relationship status (<math>\chi^2 = 22.02</math> p &lt; 0.01)</u> |              |              |              |              |             |             |
| Ever partnered                                                       | 17 (1.54)    | 68.16 (2)    | 5.03 (0.94)  | 3.31 (0.73)  | 4.09 (0.94) | 2.41 (0.8)  |
| Always single                                                        | 31.03 (3.48) | 13.54 (2.35) | 27.97 (3.94) | 17.96 (2.95) | 4.75 (1.45) | 4.74 (1.48) |
| <u>LGBTQIA Identity (<math>\chi^2 = 24.07</math> p &lt; 0.01)</u>    |              |              |              |              |             |             |
| Non-LGBTQIA                                                          | 18.69 (1.54) | 56.03 (2.03) | 10.78 (1.51) | 6.91 (1.04)  | 4.48 (0.86) | 3.12 (0.77) |
| LGBTQIA                                                              | 39.48 (5.76) | 26.62 (6.4)  | 19.19 (5)    | 10.62 (3.97) | 2.78 (1.82) | 1.31 (0.93) |

\* Test of difference in childfree prevalence between two subgroups

Table S1: Prevalence of reproductive statuses within demographic subgroups

## S2 Prevalence reproductive statuses in four-category classifications of age and education

The manuscript compares the prevalence of childfree adults by age (under 40 vs. 40+) and by education (College graduate vs. non-graduate). Here, we expand these analyses by considering four-category classifications of age and education. Figure S1 and Table S2 report the prevalence of each reproductive status within each age-based subpopulation. Figure S2 and Table S2 report the prevalence of each reproductive status with each education-based subpopulation.

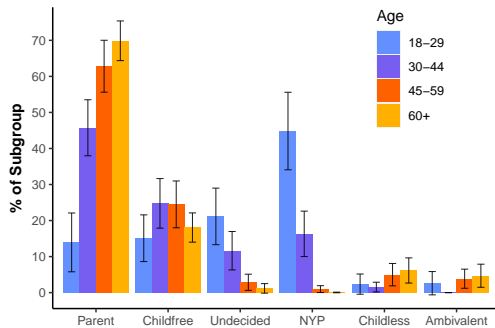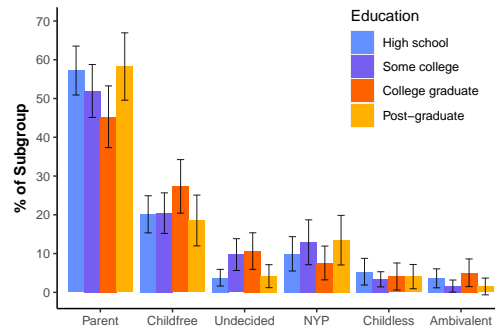

Figure S1: Prevalence of reproductive statuses within age-based subgroups

Figure S2: Prevalence of reproductive statuses within education-based subgroups

| Subgroup         | Childfree    | Parent       | NYP          | Undecided    | Childless   | Ambivalent  |
|------------------|--------------|--------------|--------------|--------------|-------------|-------------|
| <u>Age</u>       |              |              |              |              |             |             |
| 18-29            | 15.09 (3.31) | 13.94 (4.16) | 44.84 (5.49) | 21.15 (4)    | 2.36 (1.43) | 2.61 (1.65) |
| 30-44            | 24.77 (3.51) | 45.74 (3.97) | 16.31 (3.22) | 11.64 (2.72) | 1.54 (0.69) | 0 (0)       |
| 45-59            | 24.49 (3.31) | 62.82 (3.68) | 0.97 (0.49)  | 2.87 (1.15)  | 4.98 (1.59) | 3.86 (1.35) |
| 60+              | 18.06 (2.07) | 69.88 (2.81) | 0.05 (0.05)  | 1.18 (0.68)  | 6.15 (1.78) | 4.69 (1.63) |
| <u>Education</u> |              |              |              |              |             |             |
| High school      | 20.13 (2.44) | 57.21 (3.22) | 9.94 (2.26)  | 3.78 (1.1)   | 5.33 (1.75) | 3.62 (1.25) |
| Some college     | 20.43 (2.67) | 51.93 (3.48) | 12.92 (2.95) | 9.74 (2.09)  | 3.36 (1)    | 1.62 (0.8)  |
| College graduate | 27.34 (3.52) | 45.28 (4.06) | 7.58 (2.23)  | 10.65 (2.4)  | 4.09 (1.78) | 5.05 (1.82) |
| Post-graduate    | 18.53 (3.34) | 58.25 (4.43) | 13.46 (3.26) | 4.17 (1.51)  | 4.06 (1.6)  | 1.52 (1.11) |

Table S2: Prevalence of reproductive statuses within age-based and education-based subgroups
